# Supplementary material for: Forced intrusion of water and aqueous solutions in microporous materials: from fundamental thermodynamics to energy storage devices
Source: Royal Society of Chemistry journal article supplement (doi:10.1039/c7cs00478h), 2017-01-01

## Supplementary Information for:

# Forced Intrusion of Water and Aqueous Solutions in Microporous Materials: From Fundamental Thermodynamics to Energy Storage Devices

Guillaume Fraux, François-Xavier Coudert, Anne Boutin, Alain H. Fuchs

## 1 Structures of zeolite frameworks

All structures come from the International Zeolite Association structure database at <http://www.iza-structure.org/databases/>

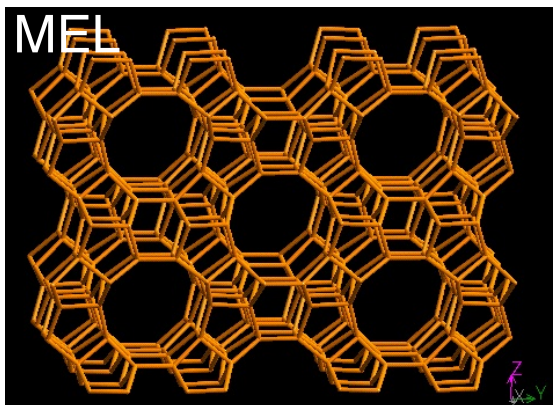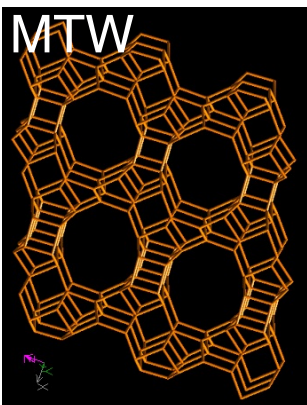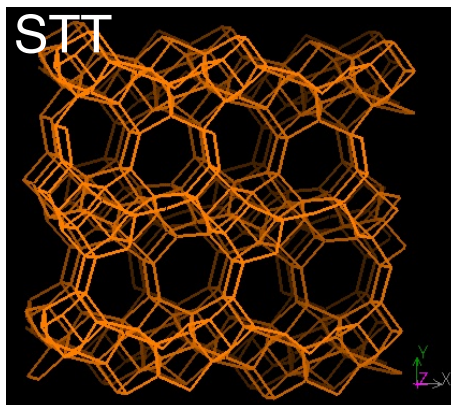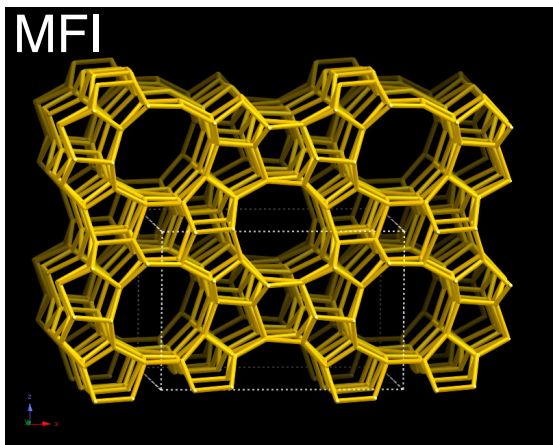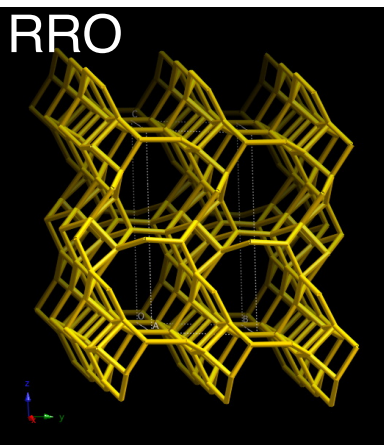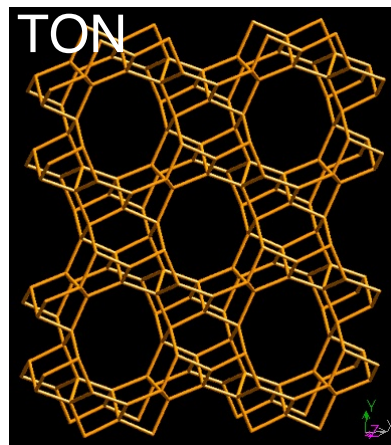

CHA

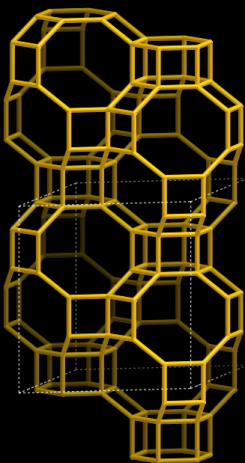

\*BEA

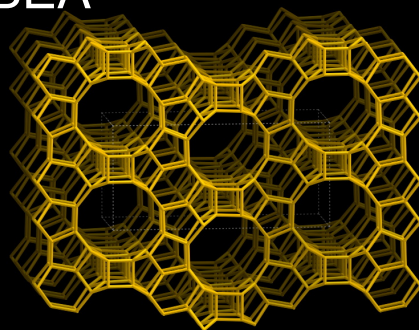

ISV

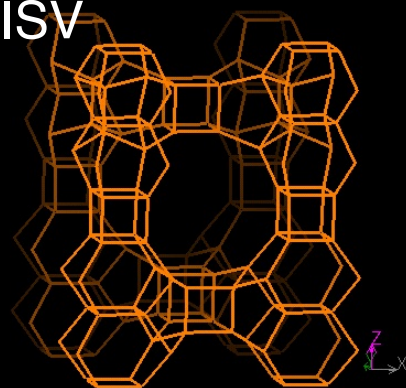

LTA

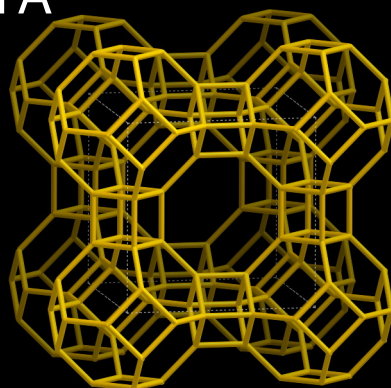

BEC

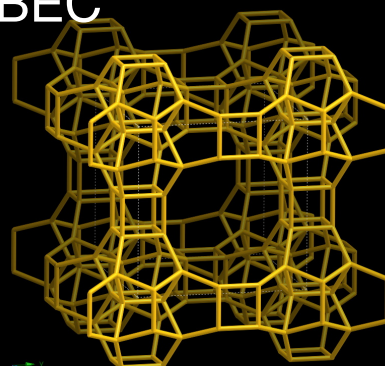

DDR

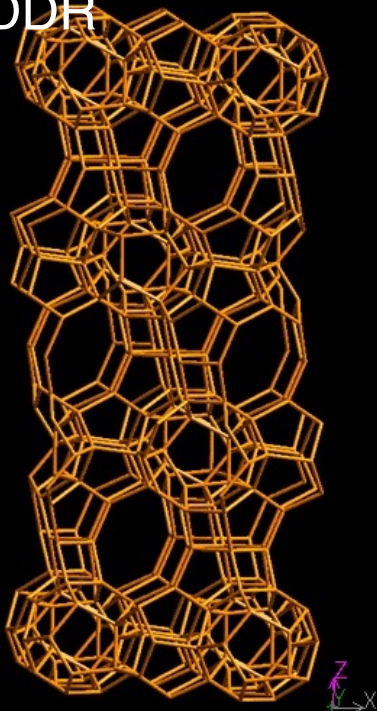

FER

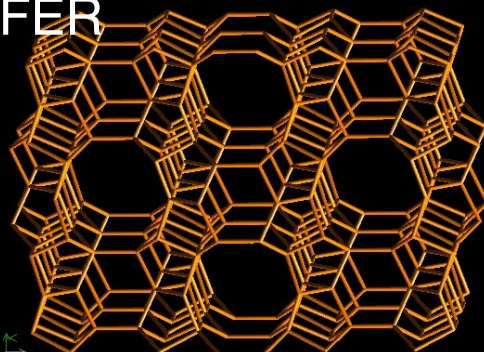

AFI

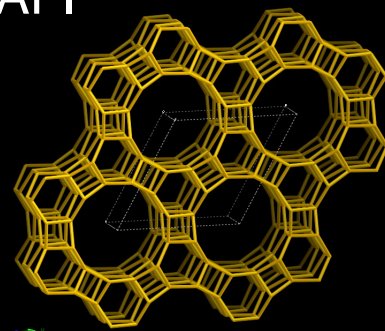

Supplement: c7cs00478h1.pdf [file c7cs00478h1.pdf]
